# Supplementary material for: Impact of the NHS Stop Smoking Services on smoking prevalence in England: a simulation modelling evaluation
Source: PubMed Central journal article supplement — Tob Control. 2019 Apr 5;29(2):200–6. doi: 10.1136/tobaccocontrol-2018-054879 (PMC7042976; doi:10.1136/tobaccocontrol-2018-054879), 2019-04-05

## Online Supplementary Appendices

### Impact of the NHS Stop Smoking Services on Smoking Prevalence in England: a Simulation Modelling Evaluation

#### Content:

- **Supplementary appendix 1.** Model structure, data sources and model parameters
- **Supplementary appendix 2.** Estimated inflow into and outflow from the population of current smokers in England: 2001 - 2016
- **Supplementary appendix 3.** Estimated quit attempts and quitting outcomes
- **Supplementary appendix 4:** Estimated number of quit attempts per 100 current smokers by support received

## Supplementary appendix 1.

### Model structure, data sources and model parameters

#### 1 Model framework

We developed a discrete time state-transition model<sup>1</sup> to simulate the adult population ( $\geq 16$ ) in England between 2001 and 2016. The population was separated into subgroups by age, sex, and smoking status. Smoking status was classified as never smokers, current smokers and former smokers. In the present study, former smokers were defined as those who stopped smoking for at least 12 months and were further classified according to time since cessation. The simulation was started using the number of adult population in 2001. Population subgroups by age and sex were updated annually according to the probability of death and smoking status transition (see Figure 1w).

Figure 1w. Outline diagram of possible transitions across smoking status

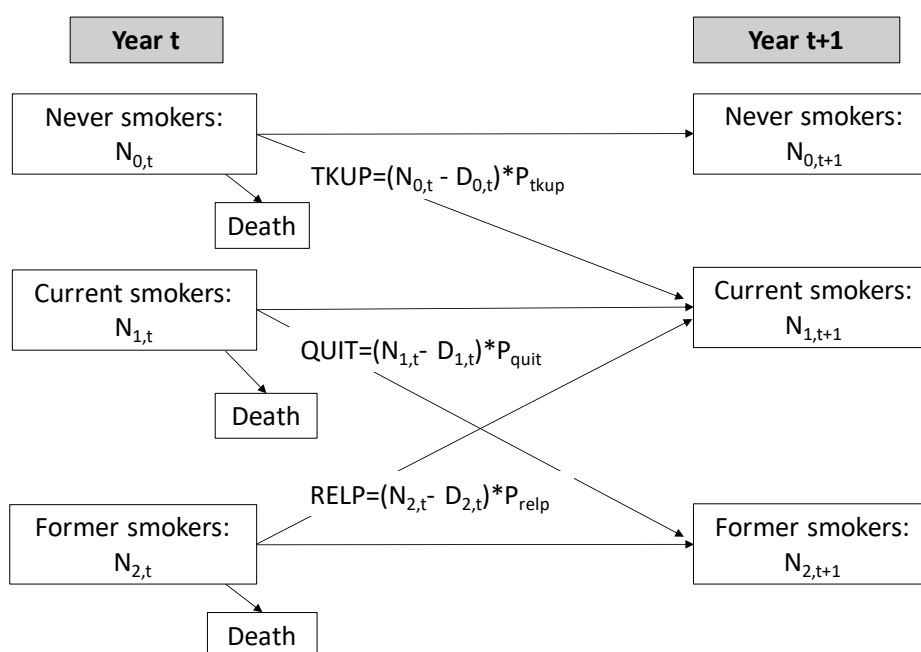

As shown in Figure 1w, after excluding people who have died in year t, never smokers at the beginning of year t may remain as never smokers or start to smoke in year t. The number of new take-ups in year t is calculated as:  $TKUP = (N_{0,t} - D_{0,t}) * P_{tkup}$ , in which  $N_{0,t}$  is the number of never smokers at the beginning of year t,  $D_{0,t}$  is the number of death in year t, and  $P_{tkup}$  is the probability of taking up in year t. The number of never smokers at the beginning of year t+1 equals:  $N_{0,t+1} = N_{0,t} - D_{0,t} - TKUP$ . Similarly, the current smokers at the beginning of year t who don't die may remain as current smokers or have stopped smoking in year t. The number of quitters in year t is calculated as:  $QUIT = (N_{1,t} - D_{1,t}) * P_{quit}$ , in which  $N_{1,t}$  is the number of current smokers at the beginning of year t,  $D_{1,t}$  is the number of death among current smokers in year t, and  $P_{quit}$  is the probability of quitting in year t. Therefore, the number of current smokers at the beginning of year t+1 equals  $N_{1,t+1} = N_{1,t} - D_{1,t} - QUIT + TKUP$ . Finally, the former smokers at the beginning of year t who don't die may remain as former smokers or have started smoking again in year t. The number of former smokers who relapse in year t is calculated as:  $RELP = (N_{2,t} - D_{2,t}) * P_{relp}$ , in which  $N_{2,t}$  is the number of former smokers at the beginning of year t,  $D_{2,t}$  is the number of deaths among former smokers, and  $P_{relp}$  is the probability of relapse in year t. Then the number of former smokers at the beginning of year t+1 equals:  $N_{2,t+1} = N_{2,t} - D_{2,t} - RELP + QUIT$ .

Note that Figure 1w shows only the main structure of the model, and the actual model is more complex after considering age/sex specific smoking status, years since cessation for former smokers, exogenously adding population aged 16 years and immigrants. In addition, the estimated total number of quitters each year was separated into two groups: quitters who

received support from the NHS SSS and those who didn't. Detailed methods/approaches used to estimate the total and service specific quitters are described in section 4.3.

## 2 Population and death risk

The mid-year population by age and sex in 2001 in England, and age- sex- specific death rates were obtained from the Office for National Statistics.<sup>2</sup> The simulation was started using the number of adult population at the start of the year 2001 in England. To estimate the size of the population at the start of the year 2001, we subtracted half of the difference in the number of population between 2000 and 2001 from the mid-year population in 2001. Then the model was used to update the population subgroups annually according to the probability of death and the transition between smoking status.

Without considering the transition between smoking status, the adult population in subsequent years was estimated using the following equation:

$$N_{c,s,a+1,t+1} = N_{c,s,a,t} \times (1 - d_{c,s,a,t})$$

Where:  $N_{c,s,a,t}$  refers size of the population for a given cigarette smoking status (c), sex (s), and age (a) in year t, and  $d_{c,s,a,t}$  refers the annual risk of death for people given smoking status (c), sex (s), and age (a) at the beginning of year (t).

The following equation was used to estimate the death risk ( $d_a$ ) for the population at the beginning of a year based on central death rates ( $m_a$ ):

$$d_a \cong \frac{m_a}{1+0.5m_a}$$

In the simulation modelling, the change in smoking prevalence in year t+1 was determined by outflow (the number of quitters and deaths among smokers) and inflow (including the number of ex-smokers who relapsed and people who took up smoking) in year t. That is, the transition between smoking status was based on (1) the probability of current smokers who stopped smoking ( $P_{quit}$ ), (2) the probability of ex-smokers who start to smoke regularly again ( $P_{relp}$ ), (3) the probability of never smokers who start to smoke regularly ( $P_{tkup}$ ). Exogenous inputs to the model included the number of people aged 16 and net immigrants, along with their smoking status. Relapse was possible at any stage of the quitting process as well as for all ex-smokers, although it is known that the longer the time since cessation, the lower the relapse risk.

The death risk based on population statistics were average estimates for never, current and former smokers. We used the following equation to estimate the death risk for never smokers:

$$Pd_0 = \frac{Pd_{all}}{Pr_{nev} + Pr_{cur} \times R_{cur} + Pr_{ex} \times R_{ex}}$$

Where  $Pd_{all}$  is the average death risk;  $Pr_{nev}$ ,  $Pr_{cur}$ , and  $Pr_{ex}$  refer the rates of prevalence of never, current and former smokers respectively;  $R_{cur}$  and  $R_{ex}$  refer the relative risk for current and ex-smokers respectively. The risk of dying for current smokers was then calculated by:  $Pd_1 = Pd_0 \times R_{cur}$ , where  $Pd_0$  is the death risk for never smokers and  $R_{cur}$  is the relative risk of death for current smokers. The risk of dying for ex-smokers was correspondingly calculated by:  $Pd_2 = Pd_0 \times R_{ex}$ , where  $R_{ex}$  is the relative risk of death for ex-smokers.

The number of people aged 16 and their smoking status were obtained from official statistics,<sup>2</sup> and provided exogenously to the model. Similarly, the number of net immigration by age and gender to England each year was obtained,<sup>3</sup> and exogenously added to the population by assuming that the immigrants had the same age-sex-specific smoking prevalence as the population in England.

## 3 Smoking status and data sources

The population were separated into subgroups by age, sex, and smoking status. The smoking status of the population were classified as never smokers, current smokers and former smokers. As the cycle length of time in the present study was one year, former smokers were defined as those who stopped smoking for  $\geq 12$  months, and were further classified according to time since cessation (quit smoking for 1, 2, 3, 4, 5, 6, 7, 8, 9, and  $\geq 10$  years).

### 3.1 Data on smoking status in England

The rates of prevalence of current and former cigarette smoking by sex and age in England were obtained from a series of General Lifestyle Surveys in England.<sup>4,5</sup> The former smokers in surveys were defined as those who were not regularly smoking at the time of survey, including those who quit  $< 12$  months. The present study used a different definition of former smokers, excluding people who quit smoking for  $< 12$  months. Therefore, the current smokers in the present study included these short-term quitters.

We used original data obtained from the Opinion Surveys in England<sup>6</sup> from 2001 to 2009 to estimate a ratio of smoking prevalence with and without short-term quitters. Due to data limitation, we applied the average ratios by age group to smoking prevalence rates in different years. After including short-term quitters, the smoking prevalence was on average increased by 1.090 or 1.083 times, for women and men, respectively (Table 1w). Using the same dataset from Opinion Surveys in England, prevalence rates of former smokers were reduced correspondingly after excluding short-term quitters (Table 2w). The rate ratios (RRs) were used to adjust the rate of former smokers in 2001 (Table 2w). Clearly, prevalence rates of current and former smokers were more sensitive to the inclusion or exclusion of short-term quitters for younger adults.

**Table 1w: Prevalence rates of current smokers with and without short-term quitters**

| Age     | Women    |               |       | Men      |               |       |
|---------|----------|---------------|-------|----------|---------------|-------|
|         | Original | With Quit<12m | RR    | Original | With Quit<12m | RR    |
| 16-17   | 23.27    | 27.23         | 1.170 | 27.91    | 30.81         | 1.104 |
| 18-19   | 29.49    | 35.48         | 1.203 | 35.03    | 36.31         | 1.037 |
| 20-24   | 35.96    | 39.65         | 1.103 | 35.68    | 38.03         | 1.066 |
| 25-29   | 34.25    | 38.54         | 1.125 | 40.78    | 44.84         | 1.100 |
| 30-34   | 28.73    | 31.99         | 1.113 | 32.97    | 36.2          | 1.098 |
| 35-39   | 27.23    | 29.93         | 1.099 | 30.82    | 33.75         | 1.095 |
| 40-44   | 27.09    | 29.28         | 1.081 | 28.36    | 30.93         | 1.091 |
| 45-49   | 26.77    | 28.03         | 1.047 | 28.05    | 30.3          | 1.080 |
| 50-54   | 26.3     | 27.95         | 1.063 | 28.38    | 30.61         | 1.079 |
| 55-59   | 23.21    | 24.66         | 1.062 | 26.89    | 28.53         | 1.061 |
| 60-     | 14.12    | 15.18         | 1.075 | 14.1     | 15.27         | 1.083 |
| Overall | 23.11    | 25.2          | 1.090 | 25.31    | 27.4          | 1.083 |

**Table 2w: Prevalence rates of former smokers with and without short-term quitters**

| Age   | Women    |                  |       | Men      |                  |       |
|-------|----------|------------------|-------|----------|------------------|-------|
|       | Original | Exclude quit<12m | RR    | Original | Exclude quit<12m | RR    |
| 16-17 | 5.94     | 1.98             | 0.333 | 4.07     | 1.16             | 0.285 |
| 18-19 | 10.6     | 4.61             | 0.435 | 5.1      | 3.82             | 0.749 |
| 20-24 | 14.42    | 10.74            | 0.745 | 14.05    | 11.71            | 0.833 |
| 25-29 | 17.42    | 13.13            | 0.754 | 13.87    | 9.81             | 0.707 |
| 30-34 | 18.19    | 14.94            | 0.821 | 18.28    | 15.05            | 0.823 |
| 35-39 | 18.38    | 15.68            | 0.853 | 19.1     | 16.18            | 0.847 |
| 40-44 | 22.91    | 20.72            | 0.904 | 22.56    | 19.98            | 0.886 |
| 45-49 | 22.23    | 20.97            | 0.943 | 24.06    | 21.82            | 0.907 |
| 50-59 | 27.91    | 26.45            | 0.948 | 33.74    | 32.1             | 0.951 |
| 60-   | 32.23    | 31.17            | 0.967 | 52.47    | 51.3             | 0.978 |
| total | 24.62    | 22.53            | 0.915 | 32.04    | 29.95            | 0.935 |

### 3.2 Smoothing reported rates of smoking prevalence

Given a general trend of declining smoking prevalence in all age groups, there were some fluctuations in rates of reported smoking prevalence over time, which was likely caused by sampling errors. To facilitate the simulation evaluation, we smoothed the smoking prevalence over time by simple linear equations (see Table 3w).

**Table 3w: Smoothed reported smoking prevalence (including those who quit for <12 months) by sex, age and year**

| Female | 2001 | 2002 | 2003 | 2004 | 2005 | 2006 | 2007 | 2008 |
|--------|------|------|------|------|------|------|------|------|
|        |      |      |      |      |      |      |      |      |

|        |       |       |       |       |       |       |       |       |
|--------|-------|-------|-------|-------|-------|-------|-------|-------|
| 16-17  | 0.344 | 0.331 | 0.319 | 0.307 | 0.294 | 0.282 | 0.270 | 0.257 |
| 18-19  | 0.353 | 0.341 | 0.328 | 0.315 | 0.303 | 0.290 | 0.277 | 0.265 |
| 20-24  | 0.381 | 0.374 | 0.368 | 0.361 | 0.355 | 0.349 | 0.342 | 0.336 |
| 25-29  | 0.349 | 0.340 | 0.331 | 0.321 | 0.312 | 0.303 | 0.293 | 0.284 |
| 30-34  | 0.346 | 0.336 | 0.327 | 0.318 | 0.309 | 0.300 | 0.290 | 0.281 |
| 35-39  | 0.307 | 0.299 | 0.291 | 0.283 | 0.276 | 0.268 | 0.260 | 0.252 |
| 40-44  | 0.302 | 0.294 | 0.287 | 0.279 | 0.271 | 0.263 | 0.256 | 0.248 |
| 45-49  | 0.293 | 0.285 | 0.278 | 0.270 | 0.263 | 0.255 | 0.248 | 0.240 |
| 50-54  | 0.261 | 0.254 | 0.247 | 0.240 | 0.233 | 0.226 | 0.219 | 0.212 |
| 55-59  | 0.261 | 0.254 | 0.247 | 0.240 | 0.233 | 0.226 | 0.219 | 0.212 |
| 60-    | 0.158 | 0.154 | 0.150 | 0.146 | 0.143 | 0.139 | 0.135 | 0.132 |
| total  | 0.271 | 0.263 | 0.256 | 0.249 | 0.242 | 0.235 | 0.228 | 0.220 |
|        |       |       |       |       |       |       |       |       |
| Female | 2009  | 2010  | 2011  | 2012  | 2013  | 2014  | 2015  | 2016  |
| 16-17  | 0.245 | 0.233 | 0.221 | 0.208 | 0.196 | 0.184 | 0.171 | 0.159 |
| 18-19  | 0.252 | 0.239 | 0.227 | 0.214 | 0.201 | 0.189 | 0.176 | 0.163 |
| 20-24  | 0.329 | 0.323 | 0.317 | 0.310 | 0.304 | 0.297 | 0.291 | 0.285 |
| 25-29  | 0.275 | 0.265 | 0.256 | 0.247 | 0.237 | 0.228 | 0.219 | 0.209 |
| 30-34  | 0.272 | 0.263 | 0.253 | 0.244 | 0.235 | 0.226 | 0.216 | 0.207 |
| 35-39  | 0.244 | 0.236 | 0.228 | 0.221 | 0.213 | 0.205 | 0.197 | 0.189 |
| 40-44  | 0.240 | 0.232 | 0.225 | 0.217 | 0.209 | 0.201 | 0.194 | 0.186 |
| 45-49  | 0.233 | 0.225 | 0.218 | 0.210 | 0.203 | 0.195 | 0.188 | 0.180 |
| 50-54  | 0.205 | 0.198 | 0.191 | 0.184 | 0.177 | 0.170 | 0.163 | 0.156 |
| 55-59  | 0.205 | 0.198 | 0.191 | 0.184 | 0.177 | 0.170 | 0.163 | 0.156 |
| 60-    | 0.128 | 0.124 | 0.120 | 0.117 | 0.113 | 0.109 | 0.105 | 0.102 |
| total  | 0.213 | 0.206 | 0.199 | 0.192 | 0.184 | 0.177 | 0.170 | 0.163 |
|        |       |       |       |       |       |       |       |       |
| Male   | 2001  | 2002  | 2003  | 2004  | 2005  | 2006  | 2007  | 2008  |
| 16-17  | 0.278 | 0.272 | 0.265 | 0.258 | 0.251 | 0.244 | 0.238 | 0.231 |
| 18-19  | 0.261 | 0.255 | 0.249 | 0.242 | 0.236 | 0.230 | 0.223 | 0.217 |
| 20-24  | 0.419 | 0.407 | 0.394 | 0.381 | 0.369 | 0.356 | 0.344 | 0.331 |
| 25-29  | 0.402 | 0.393 | 0.384 | 0.375 | 0.367 | 0.358 | 0.349 | 0.340 |
| 30-34  | 0.401 | 0.393 | 0.384 | 0.375 | 0.366 | 0.357 | 0.348 | 0.340 |
| 35-39  | 0.340 | 0.332 | 0.325 | 0.317 | 0.310 | 0.302 | 0.294 | 0.287 |
| 40-44  | 0.339 | 0.331 | 0.323 | 0.316 | 0.308 | 0.301 | 0.293 | 0.285 |
| 45-49  | 0.335 | 0.328 | 0.320 | 0.313 | 0.305 | 0.298 | 0.290 | 0.283 |
| 50-54  | 0.286 | 0.279 | 0.272 | 0.265 | 0.258 | 0.251 | 0.244 | 0.237 |
| 55-59  | 0.281 | 0.274 | 0.267 | 0.261 | 0.254 | 0.247 | 0.240 | 0.233 |
| 60-    | 0.165 | 0.162 | 0.159 | 0.156 | 0.153 | 0.150 | 0.147 | 0.143 |
| total  | 0.296 | 0.289 | 0.282 | 0.275 | 0.269 | 0.262 | 0.255 | 0.248 |
|        |       |       |       |       |       |       |       |       |
| Male   | 2009  | 2010  | 2011  | 2012  | 2013  | 2014  | 2015  | 2016  |
| 16-17  | 0.224 | 0.217 | 0.210 | 0.204 | 0.197 | 0.190 | 0.183 | 0.176 |
| 18-19  | 0.210 | 0.204 | 0.198 | 0.191 | 0.185 | 0.178 | 0.172 | 0.166 |
| 20-24  | 0.318 | 0.306 | 0.293 | 0.281 | 0.268 | 0.255 | 0.243 | 0.230 |

|       |       |       |       |       |       |       |       |       |
|-------|-------|-------|-------|-------|-------|-------|-------|-------|
| 25-29 | 0.331 | 0.322 | 0.313 | 0.305 | 0.296 | 0.287 | 0.278 | 0.269 |
| 30-34 | 0.331 | 0.322 | 0.313 | 0.304 | 0.295 | 0.286 | 0.278 | 0.269 |
| 35-39 | 0.279 | 0.271 | 0.264 | 0.256 | 0.248 | 0.241 | 0.233 | 0.226 |
| 40-44 | 0.278 | 0.270 | 0.263 | 0.255 | 0.247 | 0.240 | 0.232 | 0.225 |
| 45-49 | 0.275 | 0.268 | 0.260 | 0.253 | 0.245 | 0.238 | 0.230 | 0.223 |
| 50-54 | 0.230 | 0.223 | 0.217 | 0.210 | 0.203 | 0.196 | 0.189 | 0.182 |
| 55-59 | 0.227 | 0.220 | 0.213 | 0.206 | 0.199 | 0.193 | 0.186 | 0.179 |
| 60-   | 0.140 | 0.137 | 0.134 | 0.131 | 0.128 | 0.125 | 0.122 | 0.119 |
| total | 0.241 | 0.235 | 0.228 | 0.221 | 0.214 | 0.207 | 0.201 | 0.194 |

### 3.3 Years since cessation for former smokers

In the present study, ex-smokers were defined as those who stopped smoking for  $\geq 12$  months, and were further classified according to time since cessation: from 1, 2, 3, ... and  $\geq 10$  years. To estimate the distribution of former smokers by time since cessation at baseline in 2001, we used data from Opinion Surveys in England<sup>6</sup> to obtain results shown in Table 4w.

**Table 4w: Distribution of years since cessation for ex-smokers**

| Women | Years since cessation |       |       |       |       |       |       |       |       |           |
|-------|-----------------------|-------|-------|-------|-------|-------|-------|-------|-------|-----------|
|       | 1                     | 2     | 3     | 4     | 5     | 6     | 7     | 8     | 9     | $\geq 10$ |
| age   |                       |       |       |       |       |       |       |       |       |           |
| 16-17 | 0.750                 | 0.150 | 0.100 | 0.000 | 0.000 | 0.000 | 0.000 | 0.000 | 0.000 | 0.000     |
| 18-19 | 0.300                 | 0.400 | 0.100 | 0.100 | 0.100 | 0.000 | 0.000 | 0.000 | 0.000 | 0.000     |
| 20-24 | 0.239                 | 0.254 | 0.194 | 0.134 | 0.075 | 0.045 | 0.045 | 0.015 | 0.000 | 0.000     |
| 25-29 | 0.091                 | 0.246 | 0.109 | 0.109 | 0.127 | 0.109 | 0.055 | 0.036 | 0.027 | 0.091     |
| 30-34 | 0.112                 | 0.094 | 0.071 | 0.088 | 0.100 | 0.088 | 0.059 | 0.077 | 0.035 | 0.277     |
| 35-39 | 0.097                 | 0.048 | 0.091 | 0.059 | 0.070 | 0.048 | 0.022 | 0.075 | 0.027 | 0.462     |
| 40-44 | 0.041                 | 0.032 | 0.041 | 0.064 | 0.060 | 0.028 | 0.055 | 0.060 | 0.018 | 0.601     |
| 45-49 | 0.035                 | 0.030 | 0.035 | 0.065 | 0.060 | 0.025 | 0.020 | 0.045 | 0.015 | 0.668     |
| 50-54 | 0.036                 | 0.041 | 0.046 | 0.031 | 0.046 | 0.010 | 0.010 | 0.031 | 0.041 | 0.711     |
| 55-64 | 0.036                 | 0.029 | 0.026 | 0.035 | 0.038 | 0.022 | 0.024 | 0.016 | 0.006 | 0.769     |
| 65-74 | 0.022                 | 0.042 | 0.040 | 0.034 | 0.030 | 0.016 | 0.018 | 0.026 | 0.012 | 0.758     |
| 75+   | 0.011                 | 0.019 | 0.009 | 0.015 | 0.031 | 0.009 | 0.011 | 0.020 | 0.006 | 0.869     |
| Men   | Years since cessation |       |       |       |       |       |       |       |       |           |
| age   | 1                     | 2     | 3     | 4     | 5     | 6     | 7     | 8     | 9     | $\geq 10$ |
| 16-17 | 1.000                 | 0.000 | 0.000 | 0.000 | 0.000 | 0.000 | 0.000 | 0.000 | 0.000 | 0.000     |
| 18-19 | 0.200                 | 0.200 | 0.200 | 0.100 | 0.100 | 0.100 | 0.100 | 0.000 | 0.000 | 0.000     |
| 20-24 | 0.240                 | 0.220 | 0.140 | 0.200 | 0.060 | 0.040 | 0.050 | 0.050 | 0.000 | 0.000     |
| 25-29 | 0.158                 | 0.175 | 0.140 | 0.105 | 0.070 | 0.053 | 0.053 | 0.053 | 0.018 | 0.175     |
| 30-34 | 0.127                 | 0.119 | 0.087 | 0.040 | 0.103 | 0.064 | 0.056 | 0.079 | 0.032 | 0.294     |
| 35-39 | 0.097                 | 0.097 | 0.069 | 0.063 | 0.056 | 0.035 | 0.049 | 0.042 | 0.035 | 0.458     |
| 40-44 | 0.043                 | 0.043 | 0.075 | 0.038 | 0.081 | 0.043 | 0.027 | 0.043 | 0.016 | 0.591     |
| 45-49 | 0.011                 | 0.069 | 0.057 | 0.029 | 0.034 | 0.051 | 0.040 | 0.011 | 0.017 | 0.680     |
| 50-54 | 0.029                 | 0.017 | 0.025 | 0.038 | 0.063 | 0.034 | 0.021 | 0.034 | 0.017 | 0.723     |
| 55-64 | 0.021                 | 0.028 | 0.018 | 0.028 | 0.023 | 0.024 | 0.021 | 0.021 | 0.023 | 0.795     |
| 65-74 | 0.015                 | 0.004 | 0.012 | 0.022 | 0.019 | 0.015 | 0.016 | 0.013 | 0.006 | 0.878     |
| 75+   | 0.002                 | 0.005 | 0.007 | 0.007 | 0.016 | 0.009 | 0.005 | 0.020 | 0.005 | 0.924     |

### 3.4 Number of population aged 16 years

The number of people aged 16 years and their smoking status by sex and age category in England each year from 2002 to 2016 were provided exogenously to the model. The population data was obtained from Official Statistics.<sup>2</sup> The smoking status was based on data from a series of **General Lifestyle Surveys in England**,<sup>4,5</sup> and opinion surveys in England.<sup>6</sup> Because of limited data availability, we used the same prevalence rate of ex-smokers among people aged 16 years of age for all simulation years (Table 5w).

**Table 5w. Number of people aged 16 and their smoking status from 2002 to 2016 in England**

| Year | Female population | Male population | Female: current smokers | Male: current smokers | Female: former smokers | Male: former smokers |
|------|-------------------|-----------------|-------------------------|-----------------------|------------------------|----------------------|
| 2002 | 304928            | 321360          | 31.9%                   | 23.0%                 | 1.3%                   | 0.4%                 |
| 2003 | 312190            | 322227          | 30.3%                   | 22.2%                 | 1.3%                   | 0.4%                 |
| 2004 | 321181            | 331413          | 28.8%                   | 21.4%                 | 1.3%                   | 0.4%                 |
| 2005 | 318274            | 329206          | 27.2%                   | 20.6%                 | 1.3%                   | 0.4%                 |
| 2006 | 318915            | 336838          | 25.7%                   | 19.8%                 | 1.3%                   | 0.4%                 |
| 2007 | 329588            | 346710          | 24.1%                   | 19.0%                 | 1.3%                   | 0.4%                 |
| 2008 | 328004            | 339009          | 22.5%                   | 18.2%                 | 1.3%                   | 0.4%                 |
| 2009 | 319661            | 334158          | 21.0%                   | 17.4%                 | 1.3%                   | 0.4%                 |
| 2010 | 320118            | 338208          | 19.4%                   | 16.6%                 | 1.3%                   | 0.4%                 |
| 2011 | 313401            | 330224          | 17.8%                   | 15.7%                 | 1.3%                   | 0.4%                 |
| 2012 | 313179            | 333138          | 16.2%                   | 14.9%                 | 1.3%                   | 0.4%                 |
| 2013 | 315861            | 332004          | 14.7%                   | 14.1%                 | 1.3%                   | 0.4%                 |
| 2014 | 309406            | 325470          | 13.1%                   | 13.2%                 | 1.3%                   | 0.4%                 |
| 2015 | 307539            | 324096          | 11.5%                   | 12.4%                 | 1.3%                   | 0.4%                 |
| 2016 | 300447            | 317256          | 9.9%                    | 11.5%                 | 1.3%                   | 0.4%                 |

### 3.5 Smoking initiation and taking up

New smoking take-ups included 16-year-old smokers, which were exogenously added to the simulated population. We initially estimated uptake rates using a plot presented in Vugrin et al.<sup>7</sup> However, **the use of fixed uptake rates was found to be unsatisfactory, because new smokers aged 16 were already exogenously added to the simulated population in the current study, and uptake rates were unlikely to be the same during the whole simulation period.** Therefore, we estimated the additional number of new up-takes in year  $t-1$  (among sex-specific never smokers aged 'a-1') based on the observed increase in the number of current and former smokers between year ' $t-1$ ' and ' $t$ ' (note: the following calculations were conducted separately for women and men).

First, we estimated the number of current smokers aged 'a' in year ' $t$ ', assuming that there were no new take-ups:

$$C'(t, a) = (C(t-1, a-1) + R(t-1, a-1)) * (1 - D(t-1, a-1)) - F1(t-1, a-1);$$

Where  $C(t, a)$  refers the number of current smokers,  $R(t, a)$  refers the number of relapsers,  $D(t, a)$  refers the death probability, and  $F1(t, a)$  refers the number of new former smokers (quit for >12 months but <24 months).

Then we estimated the number of current smokers aged 'a' in year ' $t$ ' according to the observed smoking rate:

$$C(t, a) = POP(t-1, a-1) * (1 - D(t-1, a-1)) * SP(t, a);$$

In which  $POP(t-1, a-1)$  is the number of population aged 'a-1';  $SP(t, a)$  is the observed smoking prevalence. The new take-ups at age 'a-1' during year ' $t-1$ ' was estimated as:

$$TKUP(t-1, a-1) = C(t, a) - C'(t, a).$$

### 3.6 Smoking relapse among former smokers

Rates of smoking relapse among former smokers who quit at least one year were estimated based on the relapse rate curve in a paper by Stapleton and West 2012.<sup>8</sup> The rate of smoking relapse was estimated to be 15.0%, 8.0%, 4.5%, 2.0%, 1.5%, 1.0%, 0.5%, 0.3%, 0.2% and 0.1% among former smokers who stopped smoking for 1, 2, 3, 4, 5, 6, 7, 8, 9, and  $\geq 10$  years, respectively.

### 3.7 Relative risk of death among current and former smokers

Relative risks by smoking status were based on data summarised in a study by Vugrin et al.<sup>7</sup> For example, current smoking increased the risk of all cause mortality by 2.79 for men aged 55-64 years and 2.35 for women aged 55-64 years. For those aged 55-64 years, the relative risk reduced to 1.54 for men and 1.71 for women if they quit smoking at 40-49 years of age.<sup>7</sup>

## 4 Quit attempts and success rates

### 4.1 Quit attempts among current smokers

Data on overall attempts to give up smoking in the last year were obtained from Opinion Surveys in England.<sup>6</sup> The rates of people who attempted to quit in the last year were shown in Table 6w. For estimating rates of quit attempts in 2010-2016, we used a ratio of attempt rate in year t vs. in year t-1, based on data from Smoking Toolkit Study (STS).<sup>9</sup>

**Table 6w: Proportion of quit attempts among current smokers**

| Year  | 2001 | 2002 | 2003 | 2004 | 2005 | 2006 | 2007 | 2008 | 2009 | 2010 | 2011 | 2012 | 2013 | 2014 | 2015 | 2016 |
|-------|------|------|------|------|------|------|------|------|------|------|------|------|------|------|------|------|
| Women | 0.27 | 0.26 | 0.24 | 0.27 | 0.29 | 0.31 | 0.32 | 0.3  | 0.29 | 0.27 | 0.28 | 0.31 | 0.3  | 0.26 | 0.25 | 0.28 |
| Men   | 0.21 | 0.2  | 0.22 | 0.24 | 0.24 | 0.27 | 0.3  | 0.28 | 0.27 | 0.25 | 0.26 | 0.29 | 0.28 | 0.24 | 0.23 | 0.26 |

We used all data from the OSE 2001/09 to calculate the rate of quit attempts by age group (Table 7w), which were used to estimate quit attempts by age in each of the simulation years; attempt rate for a age group was adjusted according to the ratio of the average rate (2001/09) and the reported rate in a give year. For example, the ratio of the average rate and the rate in 2001 was  $0.985=0.256/0.260$  for women, the attempt rate for women aged <18 was adjusted as  $0.2865=0.291*0.985$  in 2001.

**Table 7w: Rate of quit attempts by age and sex**

| Age   | Women | Men   |
|-------|-------|-------|
| <18   | 0.291 | 0.283 |
| 18-34 | 0.332 | 0.277 |
| 35-44 | 0.247 | 0.233 |
| 45-59 | 0.219 | 0.167 |
| 60+   | 0.183 | 0.181 |
| Total | 0.256 | 0.220 |

A person who attempted to quit in the last year may have multiple attempts. We estimated the average number of attempts per person who attempted in a year using data from the OSE 2001/09. Results for 2009 were applied to year 2010-2016.

### 4.2 Quit attempts and success rates at NHS stop smoking clinics

Data on the number of people setting a quit date and quit rates at the 4 week follow-up at NHS SSS clinics were obtained from Statistics on NHS Stop Smoking Services.<sup>10</sup> In the current study, we used self-reported quit rates, in order to be consistent with the self-reported prevalence of smoking in England.

There were no routinely collected data on relapse among 4 week quitters by 12 months, and we used data from three long-term follow-up studies.<sup>11-13</sup> Use of data from two observational studies found that the average rate of self-reported abstinence at 12 months was 28.1% among all 4-week quitters,<sup>11,13</sup> although it was not reported separately by gender and age. Self-reported abstinence at 12 months by gender and age was available from a control study (SHARPISH).<sup>12</sup> We used a ratio of relapse risk in the SHARPISH trial and the two observational studies to estimate relapse risk by age and gender among 4-week quitters (Table 8w).

**Table 8w: One year cessation rate for short-terms quitters**

Notes: Overall: sharpish=0.516; pooled Ferguson & Bauld = 0.281; ratio =  $0.281/0.516=0.544$



| Age   | Women    |          |              | Men      |          |              |
|-------|----------|----------|--------------|----------|----------|--------------|
|       | sharpish | Adjusted | relapse rate | sharpish | Adjusted | relapse rate |
| 18-34 | 0.467    | 0.254    | 0.746        | 0.436    | 0.237    | 0.763        |
| 35-44 | 0.492    | 0.268    | 0.732        | 0.524    | 0.285    | 0.715        |
| 45-59 | 0.511    | 0.278    | 0.722        | 0.533    | 0.290    | 0.710        |
| 60+   | 0.531    | 0.289    | 0.711        | 0.603    | 0.328    | 0.672        |

The overall quit success rate had increased from 14.1% during 2007-2011 to 17.8% during 2012-2016,<sup>14</sup> likely due to increased use of e-cigarettes by people who attempted to quit. This increase in quit success rate should also be applicable to quit attempts with SSS-support. Therefore, the success rate among quit attempts with SSS-support was correspondingly increased by 26% since 2012 in the simulation modelling.

### 4.3 Total number of long-term quitters ( $\geq 12$ months)

There were no reliable data on the quit rates at 12 months for quit attempts without the SSS-support. Therefore, we used a novel modelling approach to estimating the number of long-term quitters in year 't+1' based on change in smoking prevalence from year 't' to year 't+1', given other inflow and outflow parameters (Figure 2w). We first calculated the number of current smokers in year t+1 ( $N'_{1,t+1}$ ) by assuming there were no smokers who stopped smoking for at least 12 months in year 't', and the number of current smokers based on the observed smoking prevalence in year 't+1' ( $N_{1,t+1}$ ). Then the difference in the number of smokers in year 't+1' by the two calculations was used to estimate the total number of quitters required in year 't' to achieve the observed smoking prevalence in year t+1 ( $QUIT_t = N'_{1,t+1} - N_{1,t+1}$ ), given other inflow and outflow-related parameters. The number of long-term quitters associated with SSS-support was estimated based on data from statistics or observational studies ( $sssQ_t$ ), while the number of long-term quitters without SSS-support was the difference between total number of long-term quitters and those with SSS-support ( $othQ_t = QUIT_t - sssQ_t$ ).

**Figure 2w. A novel modelling approach to estimating the number of quit attempts and long-term quitters with or without SSS support in England**

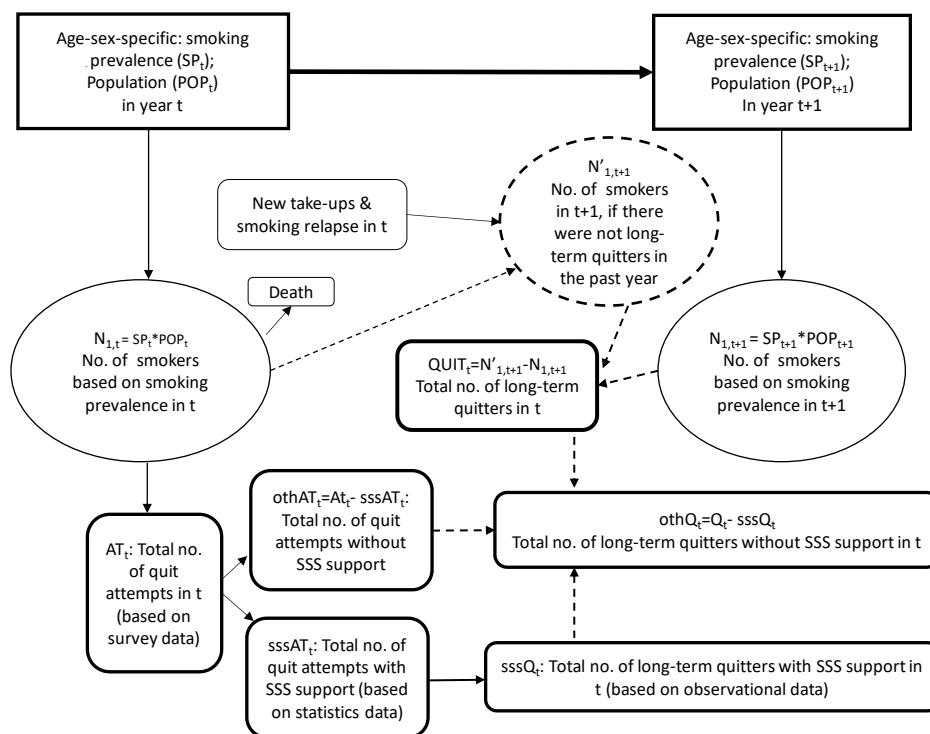

## 5 References

1. Mendez D, Warner KE, Courant PN. Has smoking cessation ceased? Expected trends in the prevalence of smoking in the United States. *Am J Epidemiol* 1998; **148**(3): 249-58.
2. ONS. User requested data: English population estimates and deaths by sex and single year of age, 1993 to 2013. 2016. [https://www.ons.gov.uk/...](https://www.ons.gov.uk/) (accessed February 1st 2017).
3. ONS. Population and migration -International migration: Office for National Statistics. 2017.
4. HSCIC. Statistics on smoking: England, 2013: Lifestyle Statistics, Health and Social Care Information Centre, Government Statistical Service., 2013.
5. HSCIC. Statistics on Smoking England: 2017: Health & Social Care Information Centre 2017.
6. ONS. Opinion Survey Report No. 40. Smoking-related behaviour and attitudes, 2008/09. Newport, South Wales: NHS Information Centre for health and social care. Office for National Statistics 2009.
7. Vugrin ED, Rostron BL, Verzi SJ, et al. Modeling the potential effects of new tobacco products and policies: a dynamic population model for multiple product use and harm. *PLoS One* 2015; **10**(3): e0121008.
8. Stapleton JA, West R. A direct method and ICER tables for the estimation of the cost-effectiveness of smoking cessation interventions in general populations: application to a new cytisine trial and other examples. *Nicotine Tob Res* 2012; **14**(4): 463-71.
9. West R, Brown J. Latest trends on smoking in England from the Smoking Toolkit Study (updated: 5th September 2017). URL <http://www.smokinginengland.info/sts-documents/>. Accessed March 20, 2018.
10. HSCIC. Statistics on NHS Stop Smoking Services England, 2017: The Health and Social Care Information Centre., 2017.
11. Ferguson J, Bauld L, Chesterman J, Judge K. The English smoking treatment services: one-year outcomes. *Addiction* 2005; **100 Suppl 2**: 59-69.
12. Blyth A, Maskrey V, Notley C, et al. Effectiveness and economic evaluation of self-help educational materials for the prevention of smoking relapse: randomised controlled trial. *Health Technol Assess* 2015; **19**(59): 1-70, v-vi.
13. Dobbie F, Hiscock R, Leonardi-Bee J, et al. Evaluating Long-term Outcomes of NHS Stop Smoking Services (ELONS): a prospective cohort study. *Health Technol Assess* 2015; **19**(95): 1-156.
14. Brown J, West R. Brief Report: Quit success rates in England 2007-2017. *Smoking in Britain* 2017; **5**: 1-8.

## Supplementary appendix 2.

### Estimated inflow into and outflow from the population of current smokers in England: 2001 - 2016

| Year                   | Total inflow | New smokers | Relapsed smokers | Migrant smokers | Total outflow | Quitters | Deaths of smokers | In-out difference | Total smokers |
|------------------------|--------------|-------------|------------------|-----------------|---------------|----------|-------------------|-------------------|---------------|
| <b>2001</b>            | 440,630      | 257,349     | 132,784          | 50,497          | 652,809       | 524,279  | 128,530           | 212,179           | 11,295,663    |
| <b>2002</b>            | 442,563      | 247,569     | 147,782          | 47,212          | 653,787       | 529,084  | 124,703           | 211,224           | 11,077,949    |
| <b>2003</b>            | 441,204      | 242,386     | 154,613          | 44,205          | 657,054       | 533,643  | 123,411           | 215,850           | 10,863,640    |
| <b>2004</b>            | 472,488      | 241,323     | 159,322          | 71,843          | 654,232       | 538,222  | 116,010           | 181,744           | 10,647,500    |
| <b>2005</b>            | 457,606      | 234,884     | 162,221          | 60,501          | 654,734       | 541,822  | 112,912           | 197,128           | 10,458,968    |
| <b>2006</b>            | 442,450      | 228,131     | 164,296          | 50,023          | 648,242       | 539,924  | 108,318           | 205,792           | 10,258,323    |
| <b>2007</b>            | 452,769      | 226,698     | 165,289          | 60,782          | 645,979       | 540,455  | 105,524           | 193,210           | 10,051,392    |
| <b>2008</b>            | 420,671      | 218,941     | 166,133          | 35,597          | 644,066       | 540,098  | 103,968           | 223,395           | 9,850,421     |
| <b>2009</b>            | 418,126      | 210,322     | 166,254          | 41,550          | 640,721       | 541,299  | 99,422            | 222,595           | 9,619,687     |
| <b>2010</b>            | 424,821      | 204,663     | 166,759          | 53,399          | 637,634       | 540,861  | 96,773            | 212,813           | 9,392,534     |
| <b>2011</b>            | 407,963      | 195,115     | 167,117          | 45,732          | 633,962       | 541,216  | 92,746            | 225,999           | 9,171,698     |
| <b>2012</b>            | 391,868      | 188,774     | 167,362          | 35,731          | 633,072       | 540,941  | 92,131            | 241,204           | 8,941,180     |
| <b>2013</b>            | 392,148      | 182,217     | 167,505          | 42,425          | 631,132       | 539,948  | 91,184            | 238,984           | 8,695,778     |
| <b>2014</b>            | 402,581      | 173,388     | 167,626          | 61,568          | 627,632       | 539,358  | 88,274            | 225,051           | 8,449,957     |
| <b>2015</b>            | 397,029      | 166,907     | 168,129          | 61,992          | 631,338       | 541,066  | 90,272            | 234,310           | 8,219,329     |
| <b>2016</b>            | 372,389      | 160,134     | 168,796          | 43,459          | 630,352       | 542,634  | 87,718            | 257,963           | 7,978,537     |
| <b>Annual average:</b> |              |             |                  |                 |               |          |                   |                   |               |
| 2001-12                | 434,430      | 224,680     | 159,994          | 49,756          | 646,358       | 537,654  | 108,704           | 211,928           | 10,135,746    |
| 2013-16                | 391,037      | 170,662     | 168,014          | 52,361          | 630,114       | 540,752  | 89,362            | 239,077           | 8,335,900     |
| <b>2001-16</b>         | 423,582      | 211,175     | 161,999          | 50,407          | 642,297       | 538,428  | 103,869           | 218,715           | 9,685,785     |

## Supplementary appendix 3.

## Estimated quit attempts and quitting outcomes

| Year                   | Total quit attempts | Proportion of smokers attempting to quit | Proportion of quit attempts with SSS-support | No. of all quitters | No. of quitters with SSS-support | Proportion of quitters with SSS-support | Success rate of quit attempts without SSS-support | Success rate of quit attempts with SSS-support |
|------------------------|---------------------|------------------------------------------|----------------------------------------------|---------------------|----------------------------------|-----------------------------------------|---------------------------------------------------|------------------------------------------------|
| <b>2001</b>            | 4,132,596           | 36.6%                                    | 5.5%                                         | 524,279             | 33,191                           | 6.3%                                    | 12.6%                                             | 14.6%                                          |
| <b>2002</b>            | 4,422,473           | 39.9%                                    | 5.3%                                         | 529,084             | 34,108                           | 6.4%                                    | 11.8%                                             | 14.5%                                          |
| <b>2003</b>            | 4,399,321           | 40.5%                                    | 8.2%                                         | 533,643             | 56,184                           | 10.5%                                   | 11.8%                                             | 15.6%                                          |
| <b>2004</b>            | 4,960,485           | 46.6%                                    | 10.7%                                        | 538,222             | 81,506                           | 15.1%                                   | 10.3%                                             | 15.4%                                          |
| <b>2005</b>            | 5,014,573           | 47.9%                                    | 12.0%                                        | 541,822             | 90,291                           | 16.7%                                   | 10.2%                                             | 15.0%                                          |
| <b>2006</b>            | 5,745,782           | 56.0%                                    | 10.4%                                        | 539,924             | 87,778                           | 16.3%                                   | 8.8%                                              | 14.6%                                          |
| <b>2007</b>            | 6,032,231           | 60.0%                                    | 11.3%                                        | 540,455             | 95,819                           | 17.7%                                   | 8.3%                                              | 14.1%                                          |
| <b>2008</b>            | 5,003,506           | 50.8%                                    | 13.4%                                        | 540,098             | 90,424                           | 16.7%                                   | 10.4%                                             | 13.5%                                          |
| <b>2009</b>            | 4,738,229           | 49.3%                                    | 16.0%                                        | 541,299             | 101,254                          | 18.7%                                   | 11.1%                                             | 13.4%                                          |
| <b>2010</b>            | 4,311,324           | 45.9%                                    | 18.3%                                        | 540,861             | 104,133                          | 19.3%                                   | 12.4%                                             | 13.2%                                          |
| <b>2011</b>            | 4,322,726           | 47.1%                                    | 18.9%                                        | 541,216             | 108,690                          | 20.1%                                   | 12.3%                                             | 13.3%                                          |
| <b>2012</b>            | 4,712,125           | 52.7%                                    | 15.4%                                        | 540,941             | 128,039                          | 23.7%                                   | 10.4%                                             | 17.7%                                          |
| <b>2013</b>            | 4,440,708           | 51.1%                                    | 13.2%                                        | 539,948             | 103,109                          | 19.1%                                   | 11.3%                                             | 17.6%                                          |
| <b>2014</b>            | 3,755,949           | 44.4%                                    | 12.0%                                        | 539,358             | 79,037                           | 14.7%                                   | 13.9%                                             | 17.5%                                          |
| <b>2015</b>            | 3,473,718           | 42.3%                                    | 11.0%                                        | 541,066             | 67,293                           | 12.4%                                   | 15.3%                                             | 17.6%                                          |
| <b>2016</b>            | 3,742,387           | 46.9%                                    | 8.2%                                         | 542,634             | 54,052                           | 10.0%                                   | 14.2%                                             | 17.6%                                          |
| <b>Annual average:</b> |                     |                                          |                                              |                     |                                  |                                         |                                                   |                                                |
| 2001-12                | 4,816,281           | 47.5%                                    | 12.1%                                        | 537,654             | 84,285                           | 15.7%                                   | 10.7%                                             | 14.5%                                          |
| 2013-16                | 3,853,191           | 46.2%                                    | 11.2%                                        | 540,752             | 75,873                           | 14.0%                                   | 13.6%                                             | 17.6%                                          |
| <b>2001-16</b>         | 4,575,508           | 47.2%                                    | 11.9%                                        | 538,428             | 82,182                           | 15.3%                                   | 11.3%                                             | 15.1%                                          |

**Supplementary appendix 4:****Estimated number of quit attempts per 100 current smokers by support received**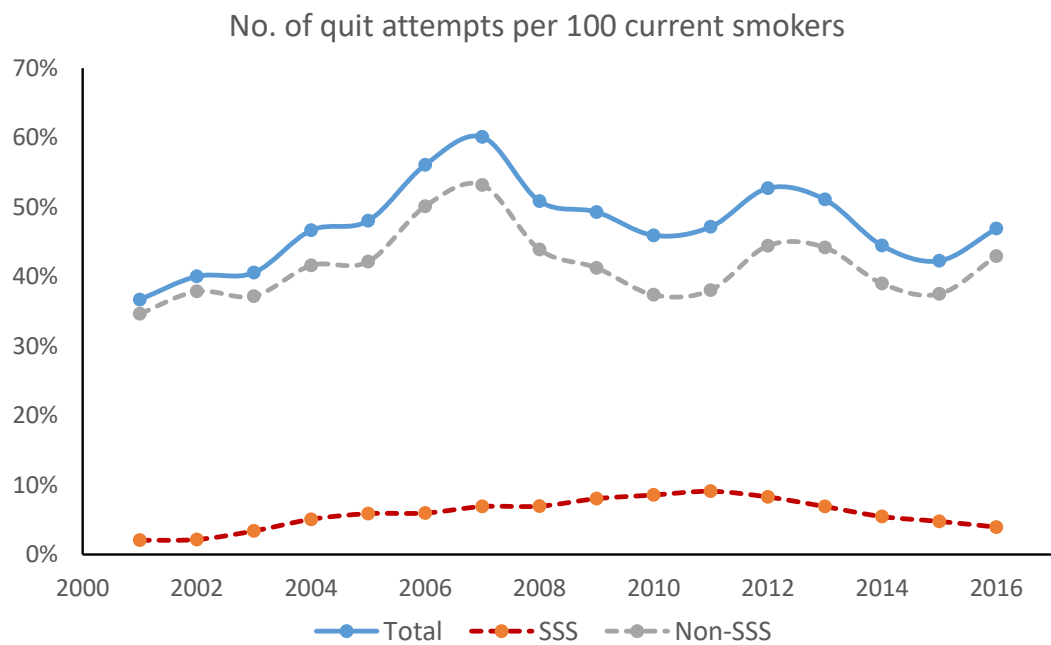

Supplement: tobaccocontrol-2018-054879supp001.pdf [file tobaccocontrol-2018-054879supp001.pdf]
